# Supplementary material for: Developing visible light responsive BN/NTCDA heterojunctions with a good degradation performance for tetracycline
Source: Royal Society of Chemistry journal article supplement (doi:10.1039/d2nj04395e), 2022-01-01
Supplement: d2nj04395e1.pdf [file d2nj04395e1.pdf]

Supplementary Material (ESI) for NEW JOURNAL OF CHEMISTRY

Developing visible light responsive BN/NTCDA heterojunction  
with good degradation performance for tetracycline

*Yong Guo<sup>a\*</sup>, Guowei Xu<sup>a</sup>, Zixuan Xu<sup>a</sup>, Ying Guo<sup>b</sup>*

- a. Key Laboratory of Integrated Regulation and Resource Development on Shallow Lakes, Ministry of Education, College of Environment, Hohai University, Nanjing, 210093, P.R. China. E-mail: [guoyong@hhu.edu.cn](mailto:guoyong@hhu.edu.cn).
- b. Key Laboratory of Environmental Engineering of Jiangsu Province, Jiangsu Provincial Academy of Environmental Science, Nanjing, 210036, China.

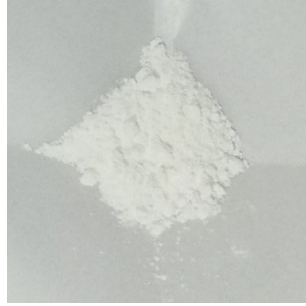

Fig. S1 The image of BN sample.

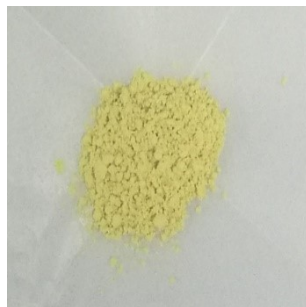

Fig. S2 The image of NTCDA sample.

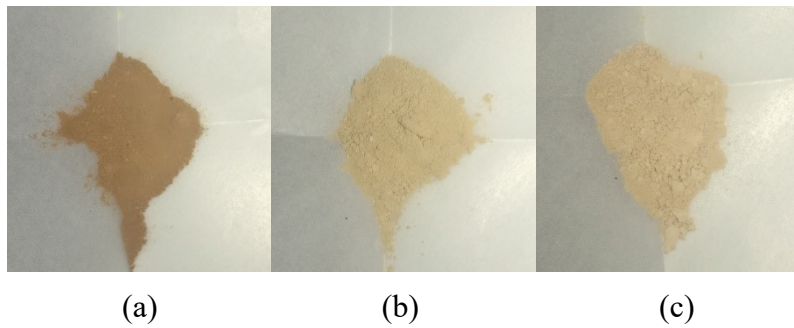

Fig. S3 (a) The image of BN/NTCDA (10:1); (b) The image of BN/NTCDA (50:1); (c) The image of BN/NTCDA (100:1);

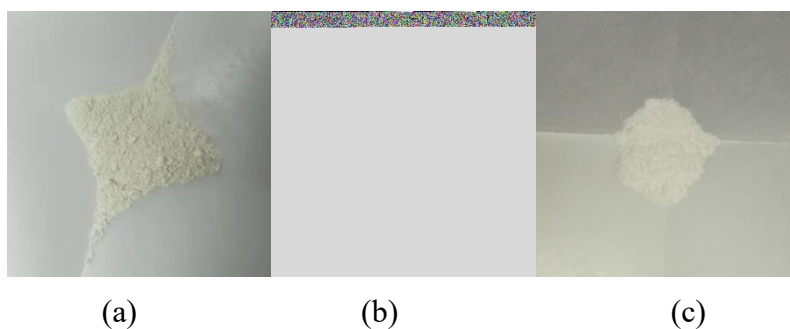

Fig. S4 The image of BN/NTCDA (100:1) prepared at different temperature (a) 250°C;(b) 350°C;(c) 450°C

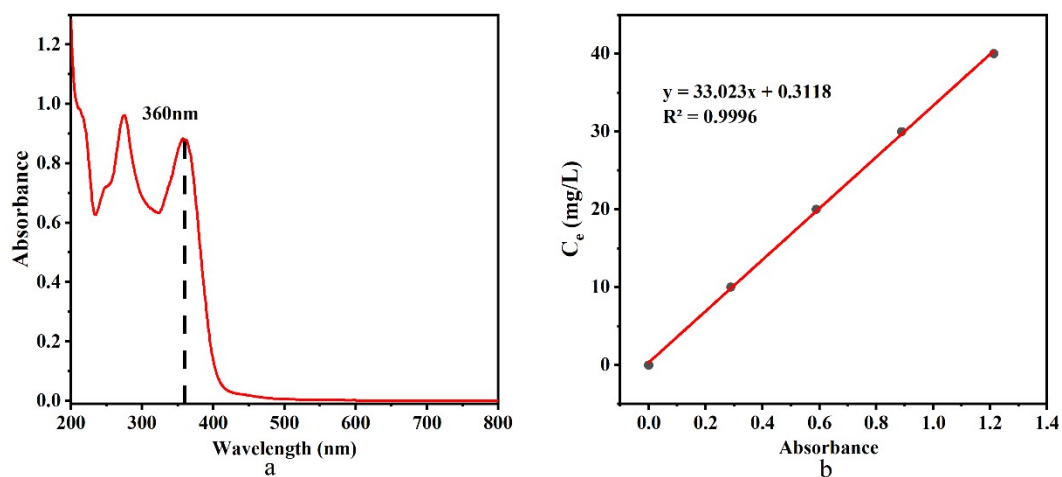

Fig. S5 (a) UV-Vis spectrum of TC; (b) The standard curve of TC.

**Table S1.** Atomic Concentration of different samples by the XPS analysis.

|                     | Atomic Concentration (%) |       |       |       |
|---------------------|--------------------------|-------|-------|-------|
|                     | C1s                      | B1s   | N1s   | O1s   |
| BN                  | 2.73                     | 50.56 | 40.02 | 6.69  |
| NTCDA               | 70.99                    | -     | -     | 29.01 |
| BN/NTCDA<br>(100:1) | 3.80                     | 49.58 | 39.42 | 7.20  |

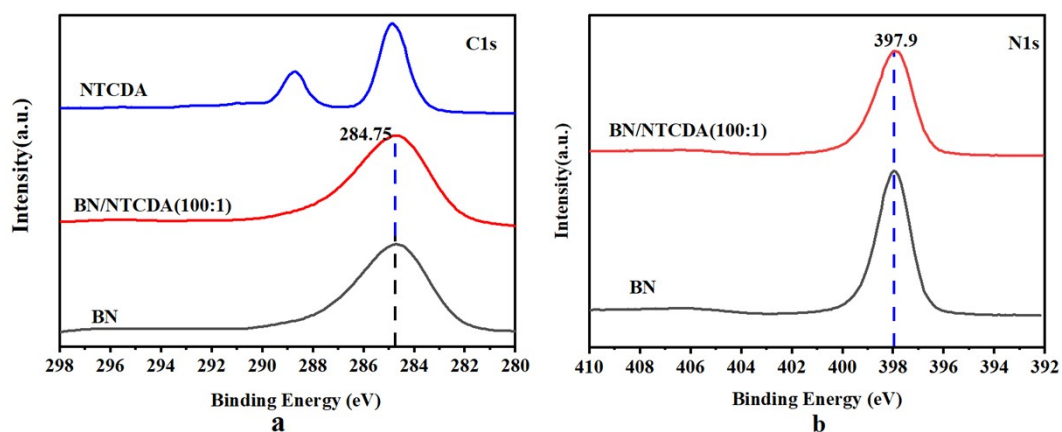

Fig. S6 (a) The C1s spectra comparison of BN, NTCDA and BN/NTCDA (100:1); (b) the N1s spectra comparison of BN and BN/NTCDA (100:1).

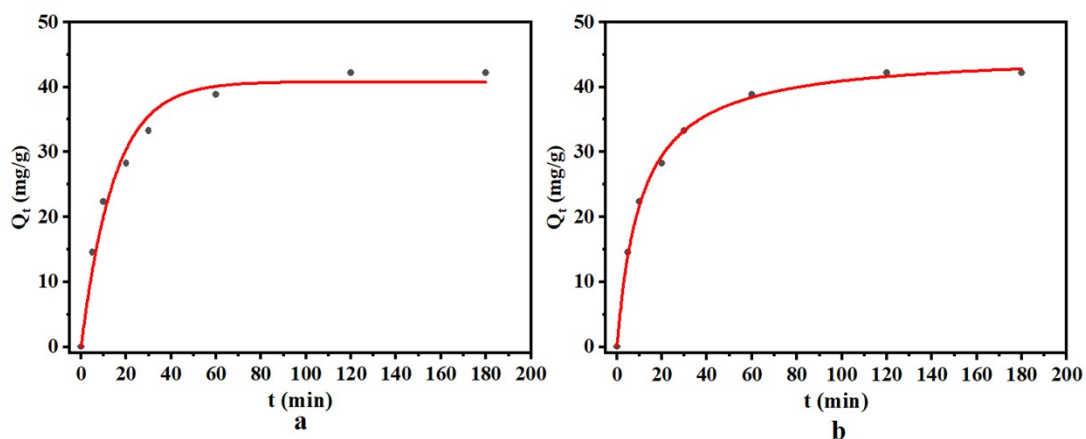

Fig. S7 (a) The pseudo-first-order adsorption kinetic fitting curve of TC by BN/NTCDA (100:1); (b) the pseudo-second-order adsorption kinetic fitting curve of TC by BN/NTCDA (100:1).

**Table. S2** Pseudo-first-order, pseudo-second-order kinetic parameters for the adsorption of TC by BN/NTCDA (100:1).

| Model               | Parameters       | Values  |
|---------------------|------------------|---------|
| Pseudo-first-order  | $K_1$ (1/min)    | 0.06842 |
|                     | $Q_e$ (mg/g)     | 40.77   |
|                     | $R^2$            | 0.9824  |
| Pseudo-second-order | $K_2$ (g/mg·min) | 0.00204 |
|                     | $Q_e$ (mg/g)     | 45.33   |
|                     | $R^2$            | 0.9981  |

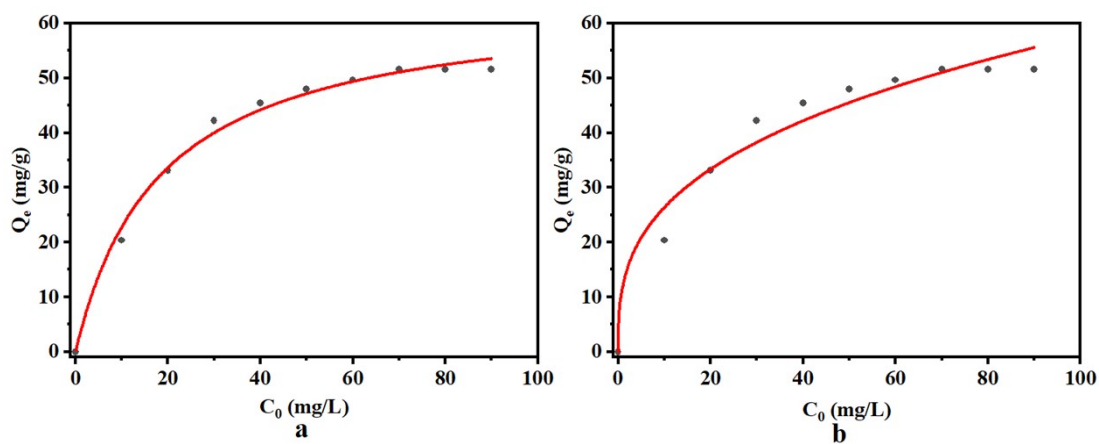

Fig. S8 (a)The Langmuir isotherm adsorption fitting curve of TC by BN/NTCDA (100:1); (b)The Freundlich isotherm adsorption fitting curve of TC by BN/NTCDA (100:1).

Table. S3 The Langmuir, Freundlich isotherm model parameters for the adsorption of TC by BN/NTCDA (100:1).

| Model      | Parameters         | Values |
|------------|--------------------|--------|
| Langmuir   | $Q_m(\text{mg/g})$ | 64.40  |
|            | $K_L(\text{L/mg})$ | 0.055  |
|            | $R^2$              | 0.9804 |
| Freundlich | K                  | 12.08  |
|            | n                  | 0.3391 |
|            | $R^2$              | 0.9663 |

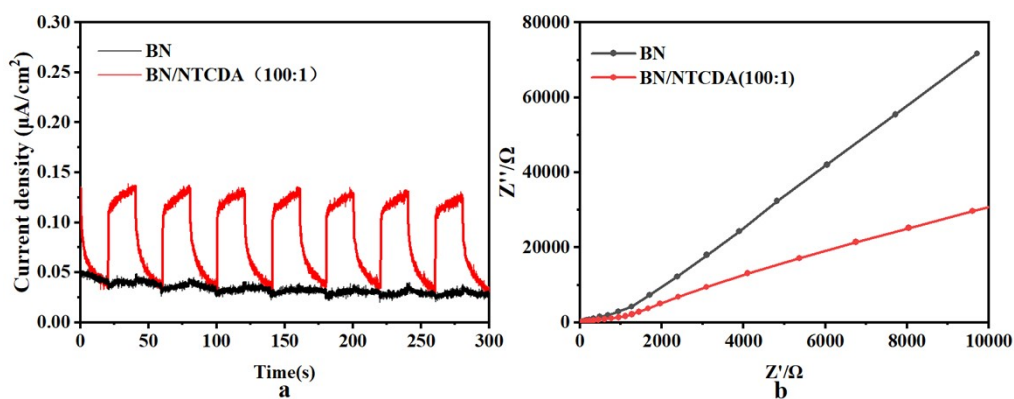

**Fig. S9** (a) Transient photocurrent response of BN and BN/NTCDA (100:1) composites. (b) EIS Nyquist plots of BN and BN/NTCDA (100:1) composites.

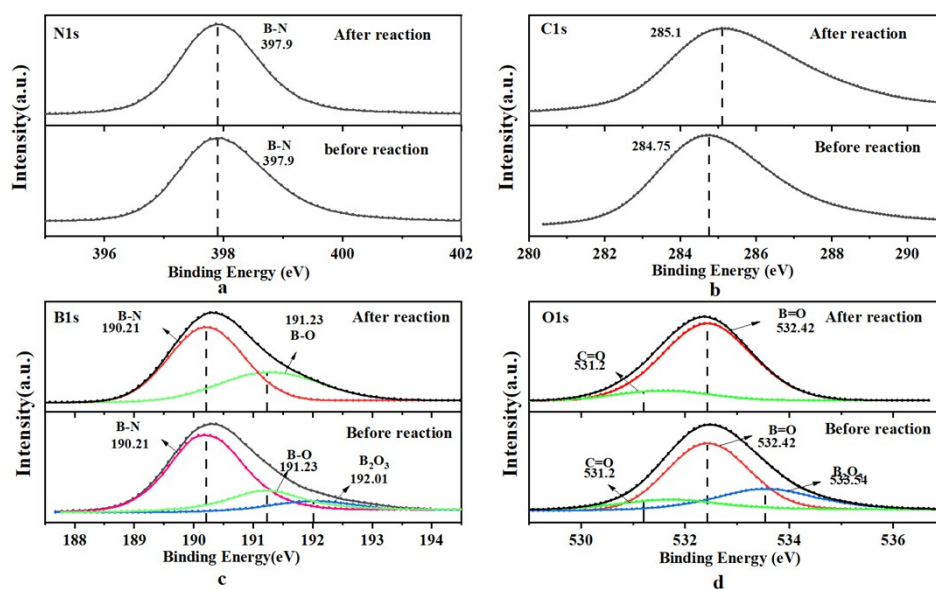

**Fig S10** XPS patterns of BN/NTCDA(100:1) before and after reaction

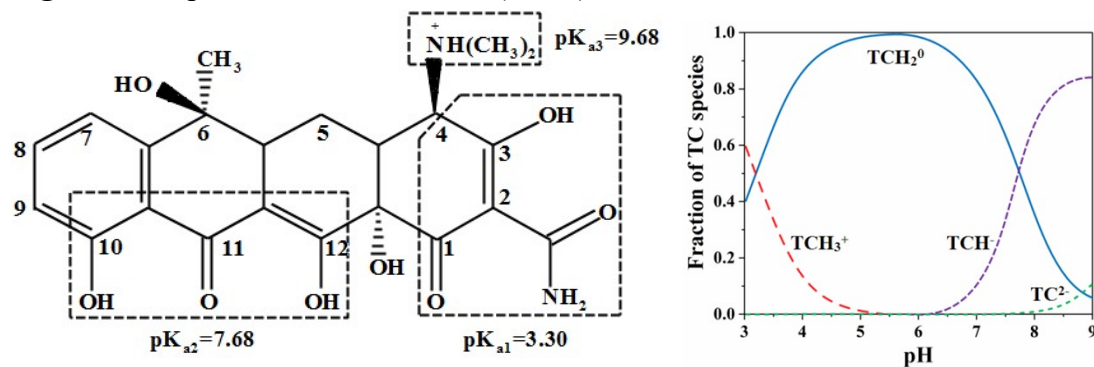

**Fig S11** Existing form of TC at different PH
